# Supplementary material for: Sex-Specific Association between Metabolic Abnormalities and Elevated Alanine Aminotransferase Levels in a Military Cohort: The CHIEF Study
Source: PubMed Central journal article supplement (PMC5877090; doi:10.3390/ijerph15030545), 2018-03-19
Supplement: ijerph-15-00545-s001.pdf [file ijerph-15-00545-s001.pdf]

# Supplementary Materials: Sex-Specific Association between Metabolic Abnormalities and Elevated Alanine Aminotransferase Levels in a Military Cohort: The CHIEF Study

Kai-Wen Chen, Fan-Chun Meng, Yu-Lueng Shih, Fang-Ying Su, Yen-Po Lin, Felicia Lin, Jia-Wei Lin, Wei-Kuo Chang, Chung-Jen Lee, Yi-Hwei Li, Chung-Bao Hsieh and Gen-Min Lin \*

**Table S1.** Baseline Characteristics of the Study Cohort based on Serum ALT levels.

| Variables                       | Overall<br>N = 7504 | Normal ALT<br>N = 6619 | Elevated ALT<br>N = 885 | p-value |
|---------------------------------|---------------------|------------------------|-------------------------|---------|
| Age (year)                      | 28.93 ± 6.04        | 28.69 ± 6.06           | 30.75 ± 5.65            | <0.0001 |
| Specialty, %                    |                     |                        |                         | <0.0001 |
| Air forces                      | 19.75               | 1.66                   | 0.34                    |         |
| Army                            | 78.74               | 79.52                  | 72.88                   |         |
| Navy                            | 1.51                | 18.82                  | 26.78                   |         |
| SEX, %                          |                     |                        |                         | <0.0001 |
| Women                           | 10.21               | 11.13                  | 3.28                    |         |
| Men                             | 89.79               | 88.87                  | 96.72                   |         |
| BMI (kg/m <sup>2</sup> ), %     | 24.96 ± 3.72        | 24.51 ± 3.47           | 28.33 ± 3.78            | <0.0001 |
| Underweight (<18.5)             | 2.00                | 2.22                   | 0.34                    | <0.0001 |
| Normal (18.5–24.9)              | 51.88               | 56.38                  | 18.19                   |         |
| Overweight (25–29.9)            | 37.34               | 35.11                  | 54.01                   |         |
| Obesity (≥30)                   | 8.78                | 6.28                   | 27.46                   |         |
| Current smoker, %               | 33.81               | 32.78                  | 41.63                   | <0.0001 |
| Current alcohol intake, %       | 45.19               | 44.45                  | 50.73                   | <0.0001 |
| ALT/AST ratio ≥ 1, %            | 47.23               | 40.53                  | 97.29                   | <0.0001 |
| Elevated blood pressure, % *    | 25.61               | 23.19                  | 43.73                   | <0.0001 |
| Waist circumference, % †        | 27.60               | 23.25                  | 60.11                   | <0.0001 |
| Serum TG ≥150 mg/dL, %          | 19.95               | 16.32                  | 47.12                   | <0.0001 |
| FPG ≥100 mg/dL, %               | 14.43               | 13.34                  | 22.60                   | <0.0001 |
| Low serum HDL, % §              | 21.16               | 18.92                  | 37.97                   | <0.0001 |
| Total cholesterol ≥200 mg/dL, % | 20.26               | 17.83                  | 38.42                   | <0.0001 |
| Metabolic syndrome (ATPIII), %  | 13.58               | 10.11                  | 39.55                   | 0.0001  |
| Metabolic syndrome (IDF), %     | 11.06               | 7.87                   | 34.92                   | <0.0001 |

Elevated ALTs are defined as alanine aminotransferase (ALT) level ≥ 40U/L in men and ≥30 U/L in women.

Continuous variables are expressed as mean ± standard deviation and categorical variables as number (percentage). Abbreviations: ALT, alanine aminotransferase; AST, aspartate aminotransferase; ATP III, National Cholesterol Education Program Adult Treatment Panel III; BMI, body mass index; FPG, fasting plasma glucose; HDL, high density lipoprotein; IDF, International Diabetes Federation; TG, triglycerides.

\* Elevated blood pressure: blood pressure ≥130/85 mm Hg or use of antihypertensive agents. † Waist circumference: ≥90 cm in men and ≥80 cm in women. § Low serum HDL: <40 mg/dL in men and <50 mg/dL in women.

**Table S2.** Univariate Analysis of Risk Factors Predicting Elevated ALT  $\geq$  30 U/L in Women.

| Variables                          | Women<br>N = 766<br>OR (95% CI) | p-value |
|------------------------------------|---------------------------------|---------|
| Age (by 5 yr increment)            | 1.42 (1.11–1.82)                | 0.006   |
| BMI (kg/m <sup>2</sup> )           |                                 |         |
| 25–29.9                            | 4.14 (1.85–9.28)                | <0.0001 |
| $\geq$ 30                          | 14.01 (4.02–48.82)              | <0.0001 |
| Serum TG $\geq$ 150 mg/dL          | 5.54 (2.24–13.75)               | <0.0001 |
| FPG $\geq$ 100 mg/dL               | 5.39 (2.06–14.12)               | 0.001   |
| Elevated blood pressure *          | 4.55 (1.75–11.79)               | 0.002   |
| Waist circumference <sup>§</sup>   | 5.03 (2.35–10.74)               | <0.0001 |
| Low serum HDL <sup>§</sup>         | 2.79 (1.32–5.88)                | 0.007   |
| Total cholesterol $\geq$ 200 mg/dL | 1.59 (0.63–3.99)                | 0.33    |
| Current alcohol intake             | 0.74 (0.28–1.97)                | 0.55    |
| Metabolic syndrome (ATPIII)        | 14.63 (5.98–35.75)              | <0.0001 |
| Metabolic syndrome (IDF)           | 14.40 (5.66–36.60)              | <0.0001 |

Data are expressed as odds ratio (OR) and 95% confidence intervals (CI). Abbreviations: ATP III, National Cholesterol Education Program Adult Treatment Panel III; BMI, body mass index; FPG, fasting plasma glucose; HDL, high density lipoprotein; IDF, International Diabetes Federation; TG, triglycerides.

\* Elevated blood pressure: blood pressure  $\geq$  130/85 mm Hg or use of antihypertensive agents. <sup>§</sup> Waist circumference:  $\geq$ 90 cm in men and  $\geq$ 80 cm in women. <sup>§</sup> Low serum HDL: <40 mg/dL in men and <50 mg/dL in women.

**Table S3.** Multivariate Analysis of the Risk Factors Predicting Elevated ALT  $\geq$  30 U/L based on Sex.

|                                    | Overall<br>N = 7504<br>OR (95% CI) | p-value | Women<br>N = 766<br>OR (95% CI) | p-value | Men<br>N = 6738<br>OR (95% CI) | p-value |
|------------------------------------|------------------------------------|---------|---------------------------------|---------|--------------------------------|---------|
| Sex (men vs women)                 | 2.03 (1.37–3.02)                   | <0.0001 | N/A                             |         | N/A                            |         |
| Age (by 5 yr increment)            | 1.03 (0.96–1.10)                   | 0.36    | 1.16 (0.86–1.57)                | 0.32    | 1.02 (0.95–1.10)               | 0.53    |
| BMI (kg/m <sup>2</sup> )           |                                    |         |                                 |         |                                |         |
| 25–29.9                            | 2.53 (2.04–3.15)                   | <0.0001 | 1.48 (0.50–4.34)                | 0.47    | 2.58 (2.06–3.22)               | <0.0001 |
| $\geq$ 30                          | 4.48 (3.34–6.00)                   | <0.0001 | 3.53 (0.71–17.52)               | 0.12    | 4.54 (3.37–6.13)               | <0.0001 |
| Serum TG $\geq$ 150 mg/dL          | 2.00 (1.68–2.38)                   | <0.0001 | 2.77 (0.95–8.12)                | 0.06    | 2.0 (1.68–2.39)                | <0.0001 |
| FPG $\geq$ 100 mg/dL               | 1.08 (0.90–1.33)                   | 0.45    | 2.67 (0.89–7.95)                | 0.08    | 1.05 (0.86–1.28)               | 0.62    |
| Elevated blood pressure *          | 1.40 (1.20–1.66)                   | <0.0001 | 2.47 (0.78–7.80)                | 0.12    | 1.40 (1.19–1.65)               | <0.0001 |
| Waist circumference <sup>§</sup>   | 1.69 (1.39–2.05)                   | <0.0001 | 2.34 (0.84–6.50)                | 0.10    | 1.68 (1.38–2.04)               | <0.0001 |
| Low serum HDL <sup>§</sup>         | 1.62 (1.36–1.92)                   | <0.0001 | 1.69 (0.69–4.12)                | 0.25    | 1.59 (1.34–1.90)               | <0.0001 |
| Total cholesterol $\geq$ 200 mg/dL | 1.80 (1.52–2.13)                   | <0.0001 | 0.85 (0.28–2.60)                | 0.78    | 1.84(1.55–2.19)                | <0.0001 |

Data are expressed as odds ratio (OR) and 95% confidence intervals (CI). Abbreviations: BMI, body mass index; FPG, fasting plasma glucose; HDL, high density lipoprotein; IDF, International Diabetes Federation; TG, triglycerides. \* Elevated blood pressure: blood pressure  $\geq$ 130/85 mm Hg or use of antihypertensive agents. <sup>§</sup> Waist circumference:  $\geq$ 90 cm in men and  $\geq$ 80 cm in women. <sup>§</sup> Low serum HDL: <40 mg/dL in men and <50 mg/dL in women.

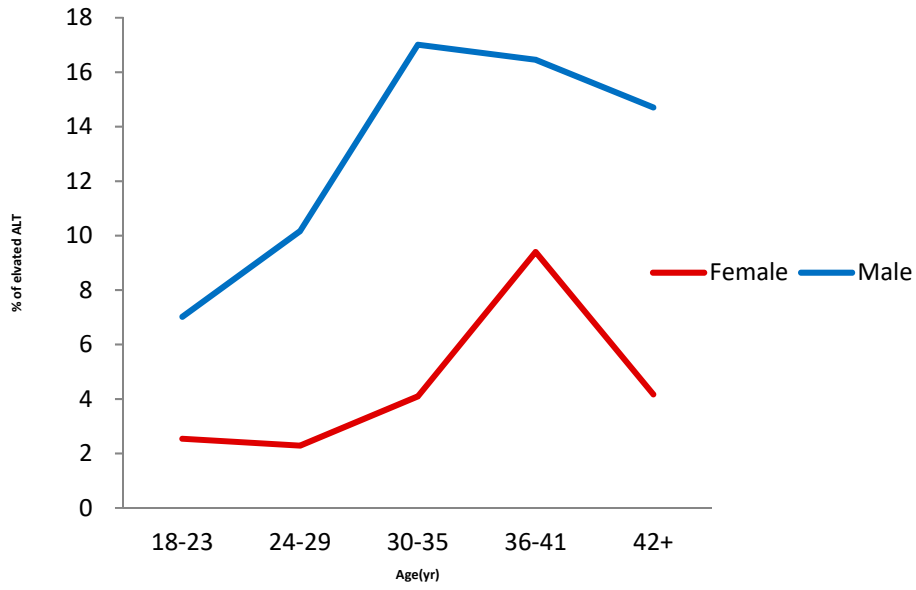

|   | 18-23   | 24-29    | 30-35    | 36-41   | 42+    |
|---|---------|----------|----------|---------|--------|
| F | 5/197   | 7/306    | 5/122    | 11/117  | 1/24   |
| M | 97/1382 | 214/2105 | 379/2228 | 146/887 | 20/136 |

**Figure S1.** The age-based prevalence of elevated ALT in men and women. #Elevated ALTs are defined as ALT level  $\geq 40$ U/L in men and  $\geq 30$  U/L in women.
